# Supplementary material for: Novel application of a discrete choice experiment to identify preferences for a national healthcare-associated infection surveillance programme: a cross-sectional study
Source: PubMed Central journal article supplement — BMJ Open. 2016 May 4;6(5):e011397. doi: 10.1136/bmjopen-2016-011397 (PMC4861107; doi:10.1136/bmjopen-2016-011397), 2016-05-04
Supplement: bmjopen-2016-011397supp_tables.pdf [file bmjopen-2016-011397supp_tables.pdf]

Supplementary file – Table 1 - Mixed logit estimates for sample including participants who mismatched duplicate question

|                                               |                              | Mean coefficient | Standard deviation |             |                |
|-----------------------------------------------|------------------------------|------------------|--------------------|-------------|----------------|
| Attribute                                     | Level                        | Coefficient      | Standard error     | Coefficient | Standard error |
| <b>Participation requirements (mandatory)</b> | Targeted 12mth / Other 3mth  | 0.824**          | 0.200              | 1.351**     | 0.236          |
|                                               | Targeted 3mth / Other 3mth   | 0.390**          | 0.146              | -0.810**    | 0.249          |
|                                               | <i>Complete choice 3mth</i>  | <i>Reference</i> |                    |             |                |
| <b>Surveillance Protocol</b>                  | Standard protocol            | 0.627**          | 0.173              | 1.644**     | 0.193          |
|                                               | <i>Light protocol</i>        | <i>Reference</i> |                    |             |                |
| <b>Competency</b>                             | Every data submission period | 0.403*           | 0.168              | 1.245**     | 0.187          |
|                                               | Annually                     | 0.604**          | 0.145              | -0.193      | 0.208          |
|                                               | <i>Every two years</i>       | <i>Reference</i> |                    |             |                |
| <b>Accuracy</b>                               | Very accurate                | 1.113**          | 0.172              | 0.940**     | 0.190          |
|                                               | Reasonably accurate          | 0.878**          | 0.156              | -0.533*     | 0.215          |

|                  | <i>Less accurate</i>               | <i>Reference</i> |                  |         |       |
|------------------|------------------------------------|------------------|------------------|---------|-------|
| <b>Reporting</b> | Public with no<br>Penalty          | 1.330**          | 0.224            | 1.314** | 0.258 |
|                  | Not Public but<br>with Penalty     | 0.433*           | 0.180            | 0.993** | 0.266 |
|                  | Not Public and<br>with no Penalty  | 0.498*           | 0.200            | 1.522** | 0.255 |
|                  | <i>Public and with<br/>Penalty</i> |                  | <i>Reference</i> |         |       |
| N                | 122                                |                  |                  |         |       |
| Observations     | 3172                               |                  |                  |         |       |

\*\* p<0.01, \* p<0.05

Log likelihood = -897.518

All attributes were dummy coded

Supplementary file – Table 2a - Conditional logit estimates by subgroup

| Attribute                  | Level                          | Age group |         | Occupation category |               | Years experience in infection prevention |         | Number of inpatient beds |            |         |
|----------------------------|--------------------------------|-----------|---------|---------------------|---------------|------------------------------------------|---------|--------------------------|------------|---------|
|                            |                                | < 50      | ≥50     | Clinician           | Non clinician | < 15                                     | ≥15     | < 200                    | 200 to 400 | >400    |
| Participation requirements | Targeted 12mth / Other 3mth    | 0.254     | 0.391** | 0.328*              | 0.475         | 0.191                                    | 0.540** | 0.404                    | 0.272      | 0.286   |
|                            | Targeted 3mth / Other 3mth     | 0.170     | 0.176   | 0.195               | 0.124         | 0.083                                    | 0.273*  | 0.182                    | 0.130      | 0.189   |
| Surveillance Protocol      | Standard protocol              | 0.494**   | 0.285*  | 0.297**             | 0.652         | 0.514**                                  | 0.241   | 0.412                    | 0.395*     | 0.281   |
| Competency                 | Every data submission period   | 0.056     | 0.367** | 0.302*              | 0.107         | 0.273                                    | 0.305*  | 0.295                    | 0.361      | 0.257   |
|                            | Annually                       | 0.324*    | 0.386** | 0.389**             | 0.282         | 0.364**                                  | 0.412** | 0.276                    | 0.422*     | 0.378*  |
| Accuracy                   | Very accurate                  | 0.720**   | 0.557** | 0.651**             | 0.476         | 0.797**                                  | 0.465** | 0.674*                   | 0.527**    | 0.644** |
|                            | Reasonably accurate            | 0.713**   | 0.369** | 0.485**             | 0.505*        | 0.588**                                  | 0.423** | 0.476                    | 0.551**    | 0.462** |
| Reporting                  | Public with no Penalty         | 0.730**   | 0.846** | 0.659**             | 1.548**       | 0.792**                                  | 0.854** | 0.517                    | 0.864**    | 0.594** |
|                            | Not Public but with Penalty    | 0.098     | 0.381** | 0.324**             | 0.132         | 0.232                                    | 0.443** | 0.315                    | 0.313      | 0.348   |
|                            | Not Public and with no Penalty | -0.054    | 0.605** | 0.270               | 0.925**       | 0.315                                    | 0.576** | 0.425                    | 0.265      | 0.272   |
| Observations               |                                | 816       | 1,584   | 1,920               | 480           | 1,224                                    | 1,104   | 384                      | 672        | 792     |

\*\*p<0.01 \*p<0.05

Supplementary file – Table 2b - Conditional logit estimates by subgroup

| Attribute                  | Level                          | State   Territory |                 |            |                      |
|----------------------------|--------------------------------|-------------------|-----------------|------------|----------------------|
|                            |                                | Victoria          | New South Wales | Queensland | SA WA TAS ACT<br> NT |
| Participation requirements | Targeted 12mth / Other 3mth    | 0.189             | 0.366           | 0.971**    | 0.169                |
|                            | Targeted 3mth / Other 3mth     | 0.167             | 0.279           | 0.224      | 0.028                |
| Surveillance Protocol      | Standard protocol              | 0.565**           | 0.040           | 0.499      | 0.467**              |
| Competency                 | Every data submission period   | 0.091             | 0.235           | 0.451      | 0.451                |
|                            | Annually                       | 0.181             | 0.355*          | 0.325      | 0.614**              |
| Accuracy                   | Very accurate                  | 0.682**           | 0.378           | 0.597*     | 0.932**              |
|                            | Reasonably accurate            | 0.598**           | 0.196           | 0.346      | 0.878**              |
| Reporting                  | Public with no Penalty         | 0.792**           | 0.778**         | 0.370      | 1.191**              |
|                            | Not Public but with Penalty    | 0.300             | 0.198           | 0.554*     | 0.234                |
|                            | Not Public and with no Penalty | 0.336             | 0.211           | 0.275      | 0.735*               |
| Observations               |                                | 696               | 696             | 384        | 624                  |

\*\*p<0.01 \*p<0.05

SA – South Australia  
 WA-Western Australia  
 TAS – Tasmania  
 ACT- Australian Capital Territory  
 NT-Northern Territory

These states and territories were combined due to the small number of respondents from each.
